# Supplementary material for: Dual roles of endothelial FGF-2–FGFR1–PDGF-BB and perivascular FGF-2–FGFR2–PDGFRβ signaling pathways in tumor vascular remodeling
Source: PubMed Central journal article supplement (PMC5798893; doi:10.1038/s41421-017-0002-1), 2018-01-16
Supplement: 41421_2017_2_MOESM1_ESM.pdf [file 41421_2017_2_MOESM1_ESM.pdf]

1 **Dual roles of endothelial FGF-2-FGFR1-PDGF-BB and perivascular FGF-2-**  
2 **FGFR2-PDGFR $\beta$  signaling pathways in tumor vascular remodeling**

3  
4  
5  
6  
7 Kayoko Hosaka<sup>1,2</sup>, Yunlong Yang<sup>1,2</sup>, Masaki Nakamura<sup>1</sup>, Patrik Andersson<sup>1</sup>, Xiaojuan  
8 Yang<sup>1</sup>, Yin Zhang<sup>1</sup>, Takahiro Seki<sup>1</sup>, Martin Scherzer<sup>1</sup>, Olivier Dubey<sup>1</sup>, Xinsheng  
9 Wang<sup>2</sup> and Yihai Cao<sup>1,2,3, \*</sup>

10  
11  
12  
13  
14 <sup>1</sup>Department of Microbiology, Tumor and Cell Biology, Karolinska Institute, 171 77  
15 Stockholm, Sweden.

16  
17  
18 <sup>2</sup>Central Research Laboratory, The Affiliated Hospital of Qingdao University,  
19 Qingdao, 266071, China

20  
21  
22 <sup>3</sup>Department of Cardiovascular Sciences, University of Leicester and NIHR Leicester  
23 Cardiovascular Biomedical Research Unit, Glenfield Hospital, Leicester, LE3 9QP,  
24 UK.

25  
26  
27  
28  
29  
30  
31 \*Correspondence, galley proofs and reprint requests should be addressed to: Yihai  
32 Cao, M.D., Ph.D., Department of Microbiology, Tumor and Cell Biology, Karolinska  
33 Institutet, 171 77 Stockholm, Sweden. Tel: (+46)-8-5248 7596, Fax: (+46)-8-33 13  
34 99, e-mail: [yihai.cao@ki.se](mailto:yihai.cao@ki.se)

35  
36  
37 **Key words:** Pericyte, FGF, PDGF, tumor growth, vascular remodeling

38  
39  
40 **Running title:** FGF-2 promotes tumor vessel remodeling

41  
42  
43  
44  
45  
46 The authors declare no potential conflicts of interest.

1

## Supplementary figures and figure legends

Figure S1

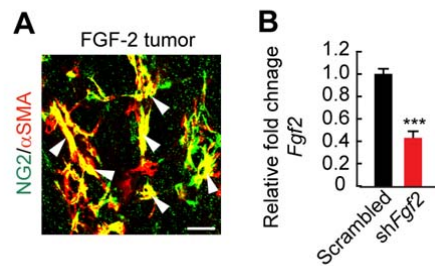

2

### 3 **Fig. S1. $\alpha$ SMA and NG2 staining and knockdown efficiency**

4 (A) NG2<sup>+</sup> (green) and  $\alpha$ SMA<sup>+</sup> (red) staining. Arrowheads indicate double  
5 positive signals. Bar = 50  $\mu$ m. Images are shown using whole mount  
6 staining.

7 (B) *Fgf2* mRNA expression levels in *scrambled-RNA*- and *Fgf2-shRNA*-  
8 transfected FGF-2<sup>+</sup> tumors (n = 3 independent measurements/group).

9 Data as means  $\pm$  SEM; Student's *t* test, \*\*\* P<0.001.

10

1

Figure S2

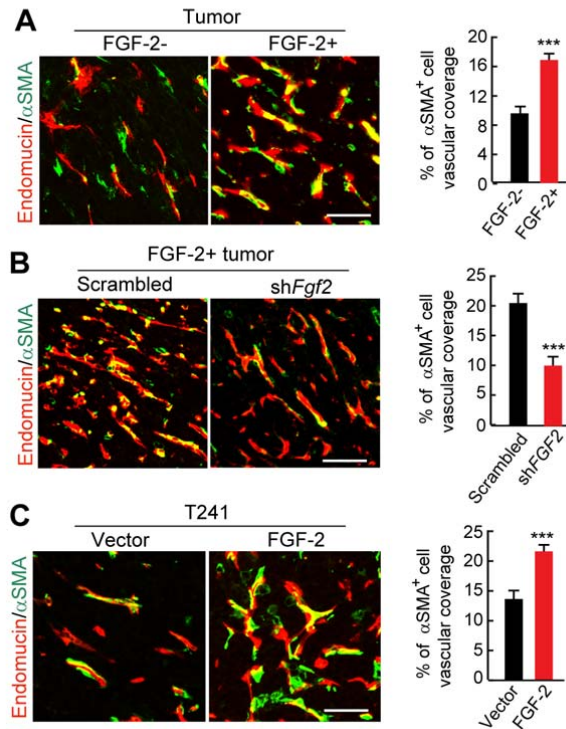

2

3 **Fig. S2.  $\alpha$ SMA and endomucin staining**

4 Endomucin endothelial (red) and  $\alpha$ SMA cells (green) in FGF-2<sup>+</sup> and FGF<sup>-</sup> (A),  
5 *scrambled-shRNA* and *Fgf2-shRNA*-transfected FGF-2<sup>+</sup> (B), and T241-vector and  
6 T241-FGF-2 tumors (C). Bar = 50  $\mu$ m. Quantification of  $\alpha$ SMA<sup>+</sup> pericyte coverage (n  
7 = 10 random fields/group) are shown respectively. Images are presented using  
8 immunohistochemistry method.

9 Data as means  $\pm$  SEM; Student's *t* test, \*\*\* P<0.001.

10

Figure S3

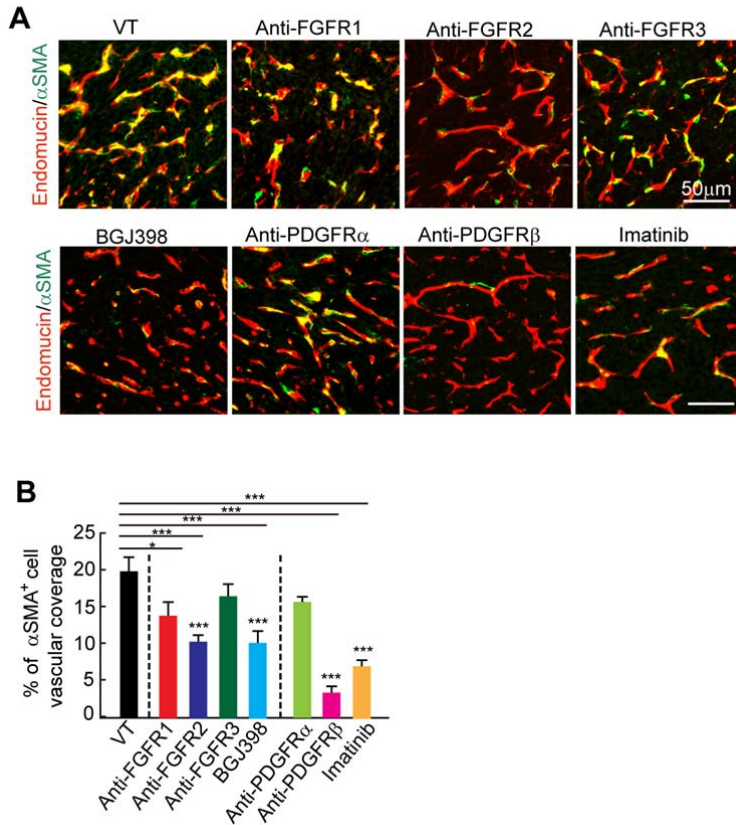

1  
2  
3  
4  
5  
6  
7  
8  
9  
10  
11

**Fig. S3. Effects of FGF and PDGF signaling inhibition in FGF-2 tumors**

(A) Endomucin endothelial (red) and  $\alpha$ SMA cells (green) in vehicle (VT)-, anti-FGFR1 antibody-, anti-FGFR2 antibody treated-, anti-FGFR3 antibody-, BGJ398-, anti-PDGFR $\alpha$  antibody-, anti-PDGFR $\beta$  antibody-, and imatinib-treated FGF-2<sup>+</sup> tumors. Bar = 50  $\mu$ m. Images are obtained using immunohistochemistry method

(B) Quantification of  $\alpha$ SMA<sup>+</sup> pericyte coverage in FGF-2<sup>+</sup> tumor vasculatures (n = 10 fields/group).

All data as means  $\pm$  S.E.M; Student's *t* test, \* P<0.05, \*\* P<0.01 and \*\*\* P<0.001.

Figure S4

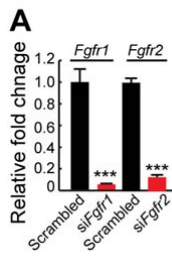

1

2 **Fig. S4. Knockdown efficiency of *siFGF2-RNA***

3 (A) *Fgfr1* and *Fgfr2* mRNA expression levels in *Scrambled-siRNA-*, *siFgfr1-*  
4 *RNA-*, and *siFgfr2-RNA-*transfected pericytes (n = 3 independent  
5 measurements/group).

6 Data as means  $\pm$  SEM; Student's *t* test, \*\*\* P<0.001.

7

Figure S5

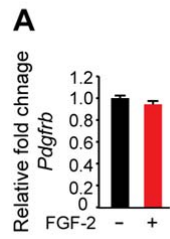

1

2 **Fig. S5. *Pdgfrb* gene expression level in pericytes.**

3 (A) *Pdgfrb* mRNA expression levels in FGF-2-stimulated pericytes (n = 3

4 samples /group).

5 Data as means  $\pm$  SEM; Student's *t* test. Experiments were repeated three times.

6

# Figure S6

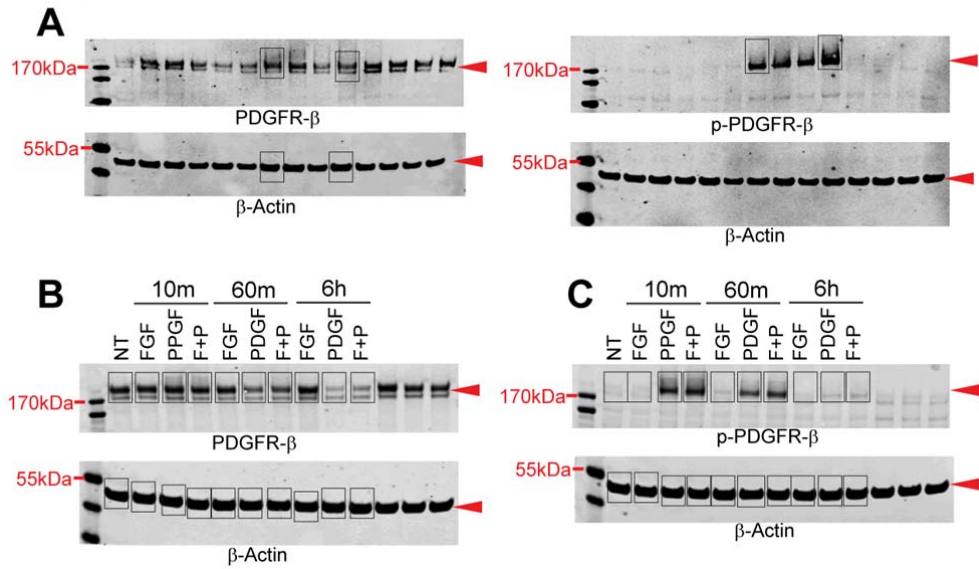

1

2 **Fig. S6. Original full length western blots used for Fig. 5.**

3 (A) Original western blots used for Fig. 5A.

4 (B) Original western blots used for Fig. 5B.

5 NT=no treatment; FGF =FGF-2; PDGF =PDGF-BB; F+P = FGF-2

6 +PDGF-BB

7 (C) Original western blots used for Fig. 5C.

8 NT=no treatment; FGF =FGF-2; PDGF =PDGF-BB; F+P = FGF-2

9 +PDGF-BB

10 Cropped parts presented in Fig. 5A-C were marked with black squares.

11

1

Figure S7

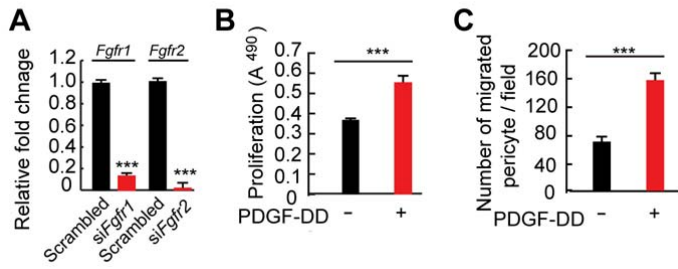

2

3 **Fig. S7. *Pdgfrb* mRNA expression levels in pericytes.**

4 (A) *Fgfr1* and *Fgfr2* mRNA levels in ECs (n = 3 independent

5 measurements/group).

6 (B) Pericyte proliferation after PDGF-DD stimulation (n = 6 samples/group).

7 (C) Pericyte proliferation after PDGF-DD stimulation (n = 6 samples/group).

8 Data as means ± SEM; Student's *t* test, \*\*\* P < 0.001. Experiments were repeated

9 three times.
